# Supplementary material for: Methylomic analysis identifies C11orf87 as a novel epigenetic biomarker for GI cancers
Source: PubMed Central journal article supplement (PMC8062079; doi:10.1371/journal.pone.0250499), 2021-04-22

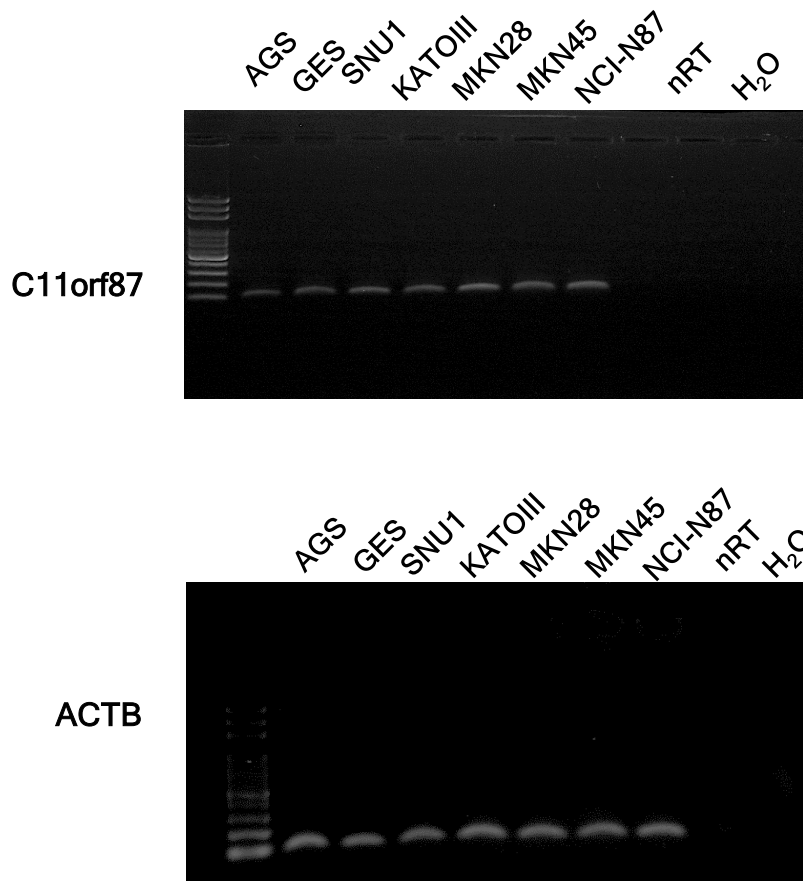

Supplement: pone.0250499.s001.pdf [file pone.0250499.s001.pdf]
